# Supplementary material for: Aneuploidy and Improved Growth Are Coincident but Not Causal in a Yeast Cancer Model
Source: PubMed Central journal article supplement (PMC2708349; doi:10.1371/journal.pbio.1000161), 2009-07-28

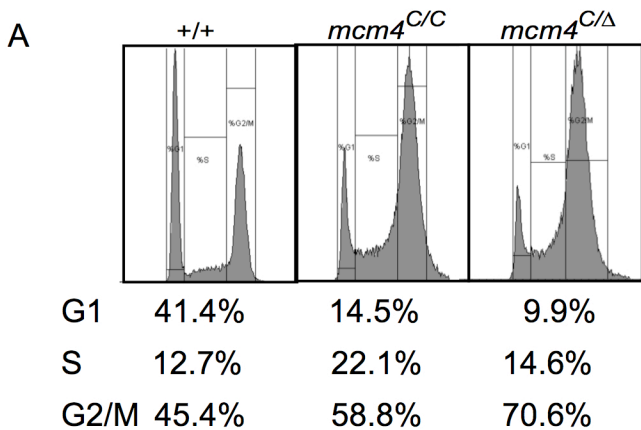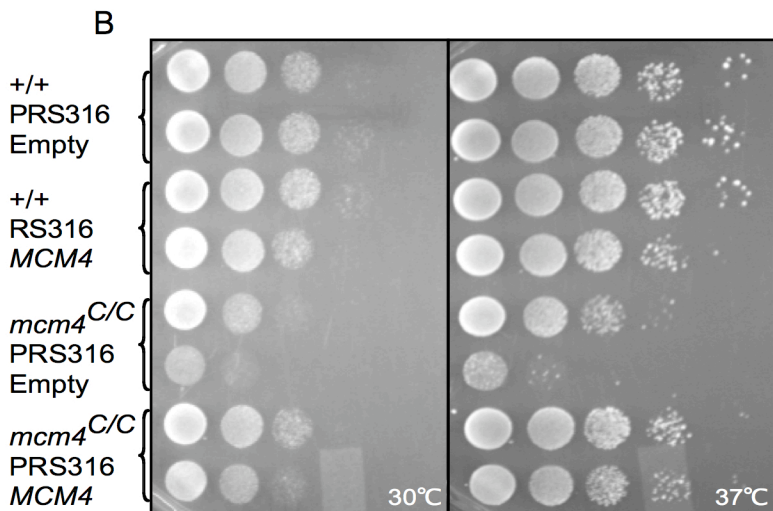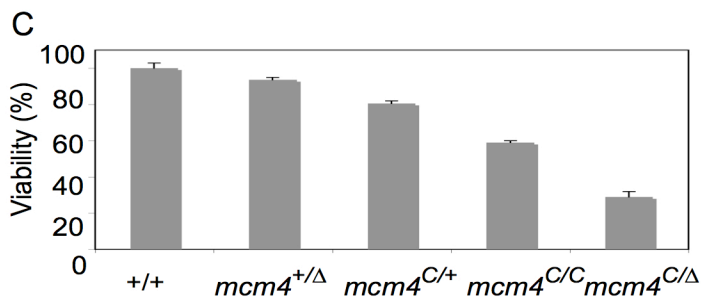

D

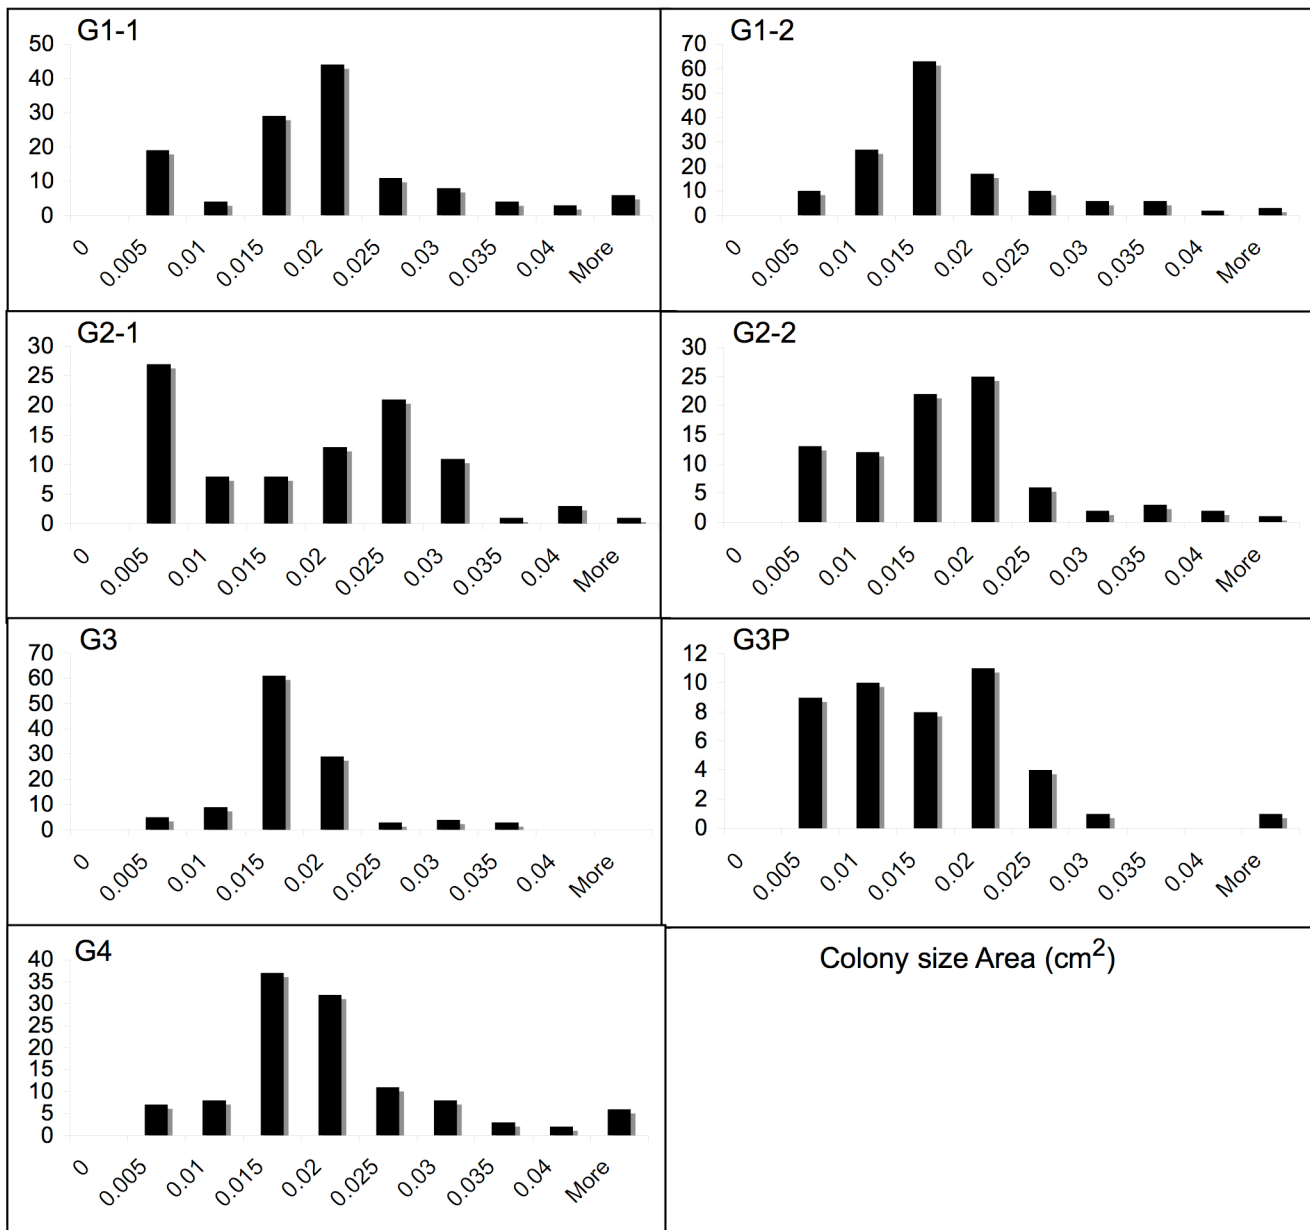

Colony size Area (cm<sup>2</sup>)

Colony size Area (cm<sup>2</sup>)

E

YPD

100mM HU

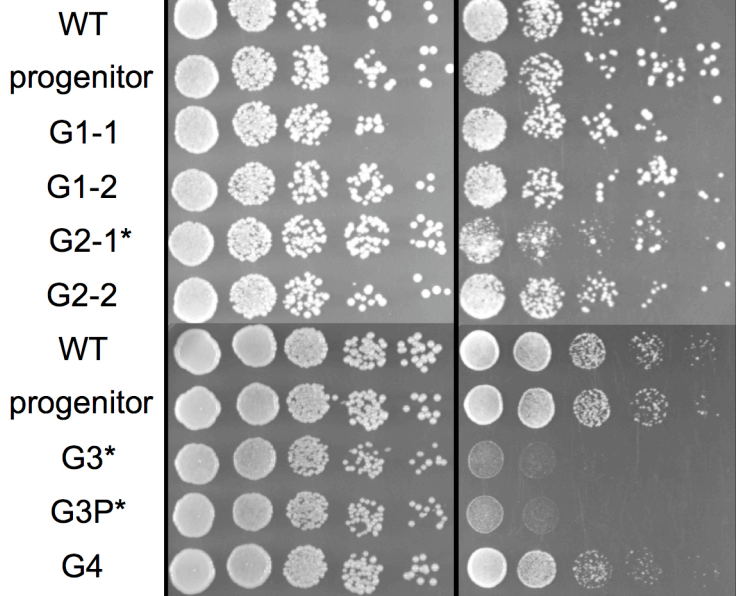

Supplement: pbio.1000161.s002.pdf [file pbio.1000161.s002.pdf]
