# Supplementary material for: Aneuploidy and Improved Growth Are Coincident but Not Causal in a Yeast Cancer Model
Source: PubMed Central journal article supplement (PMC2708349; doi:10.1371/journal.pbio.1000161), 2009-07-28

A Common Translocation between ChrVII and ChrXVI in G1-1 and G1-2

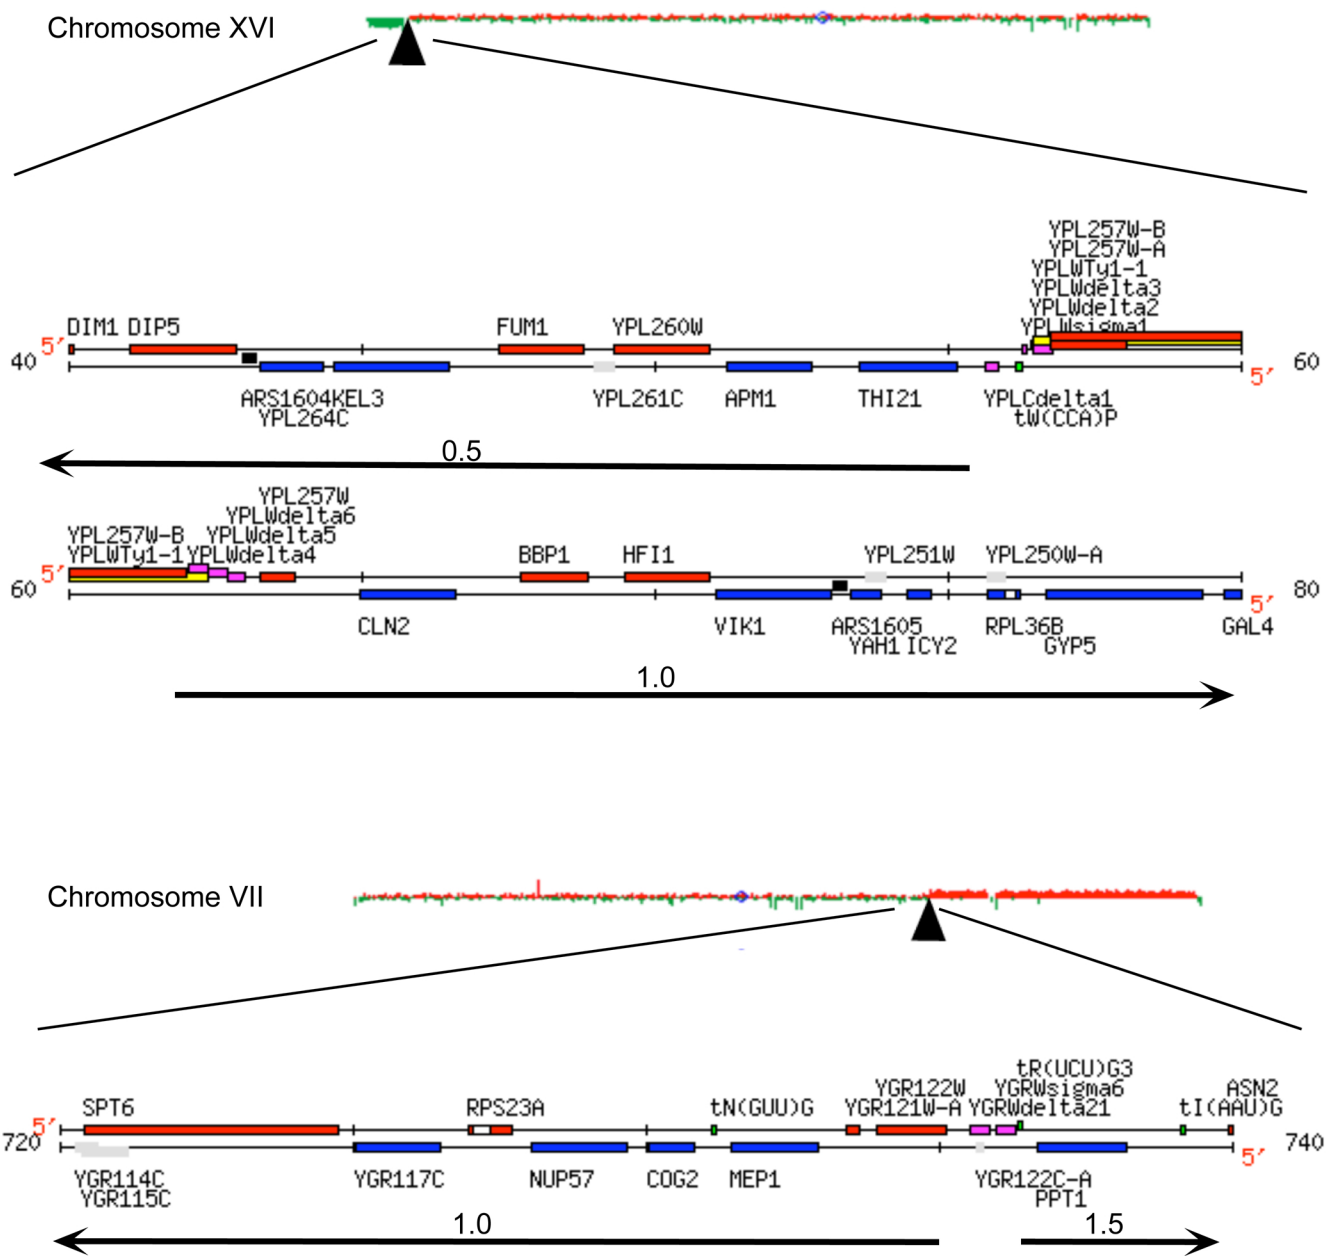

## B Amplification in G2-2

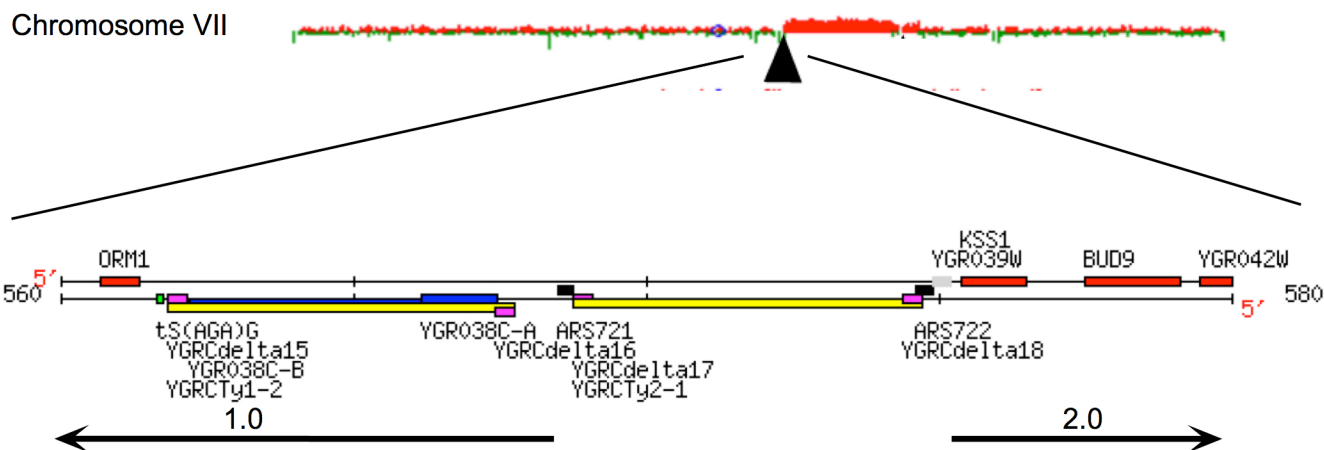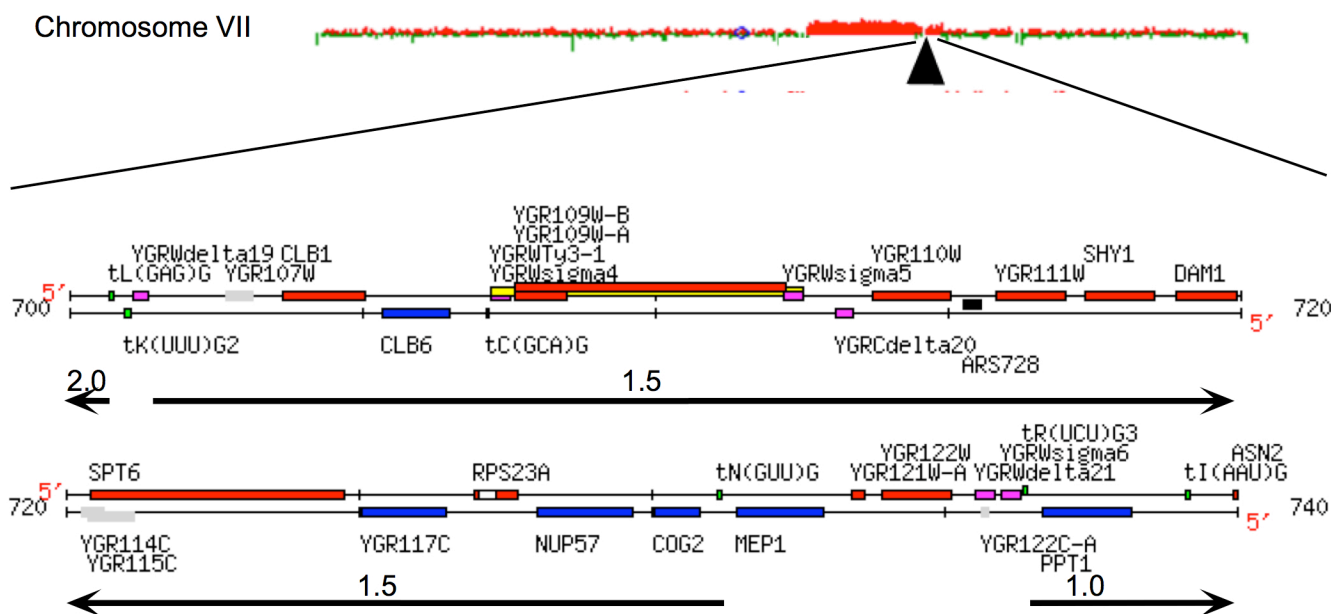

C translocation between chrVI and chrXII in G3 and G3P

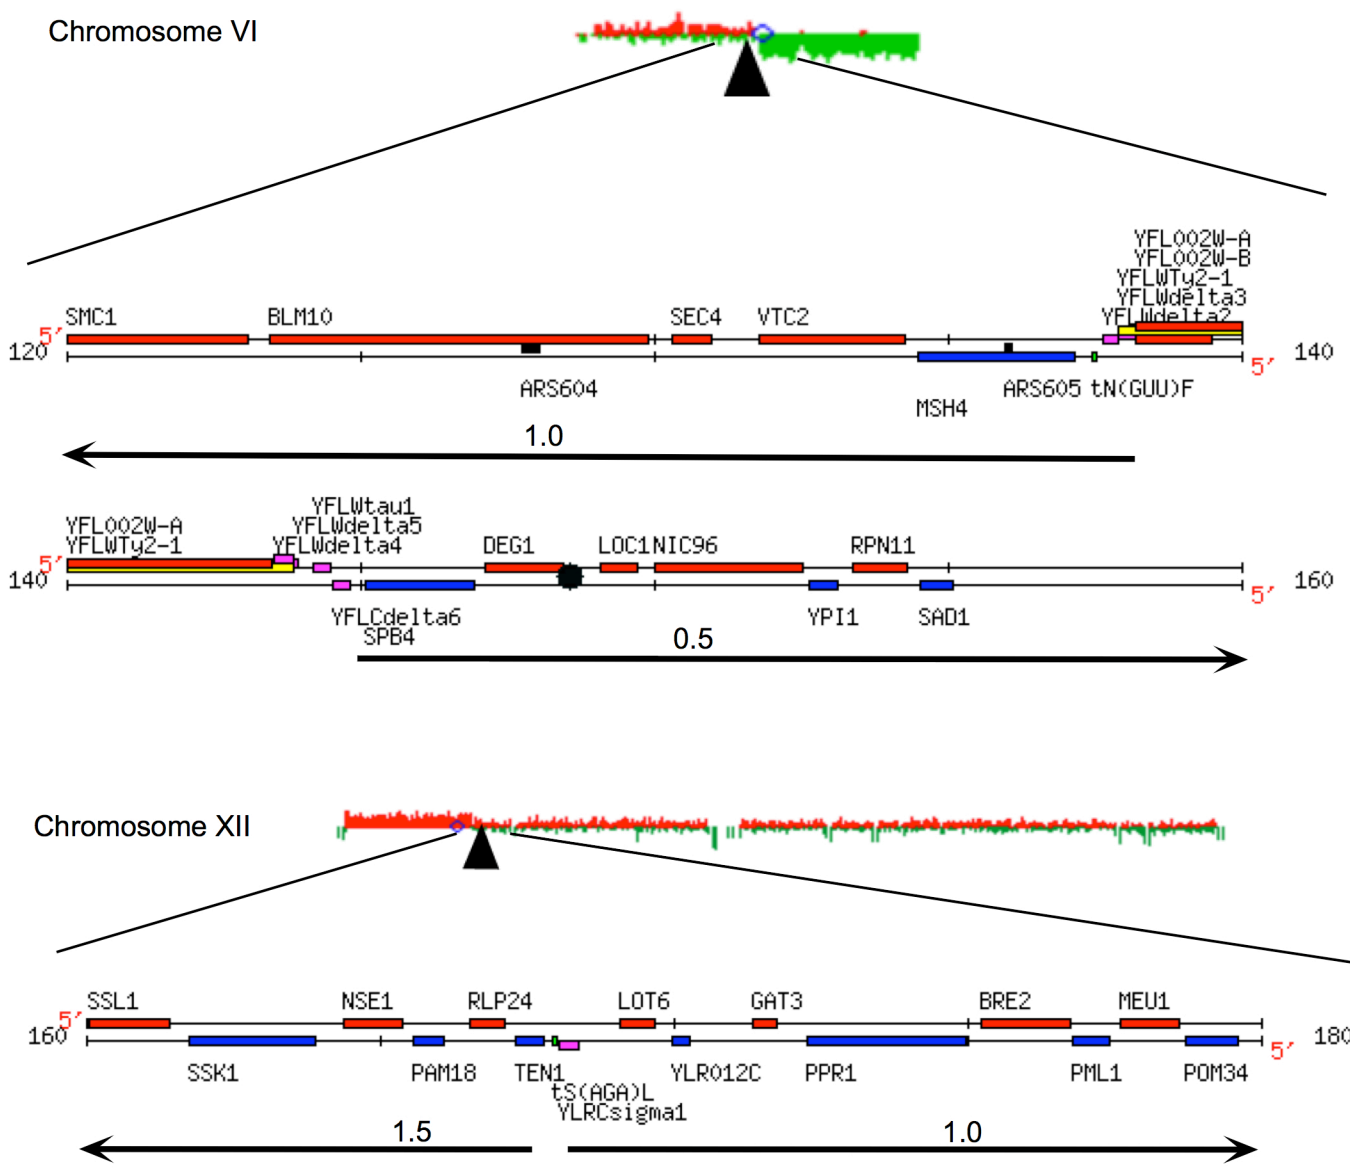

D Common intra-chromosomal deletion on chrV in G3, G3P and G4.

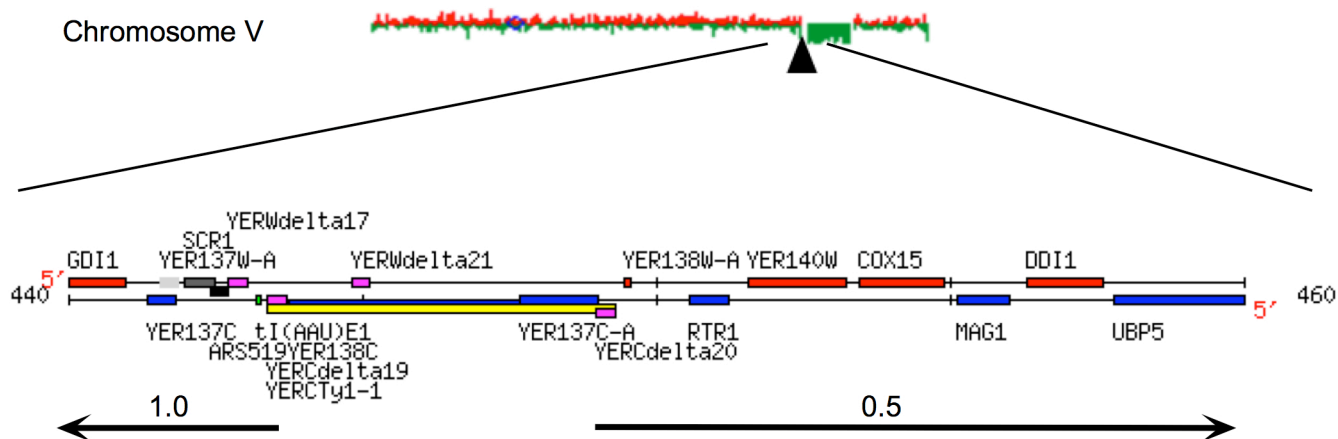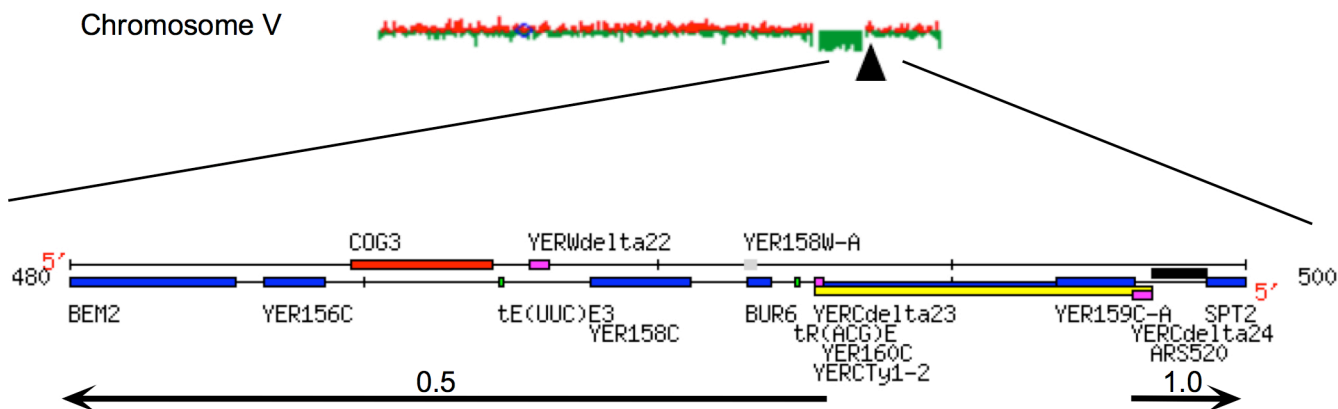

E Gene amplification on chrXIII in G4

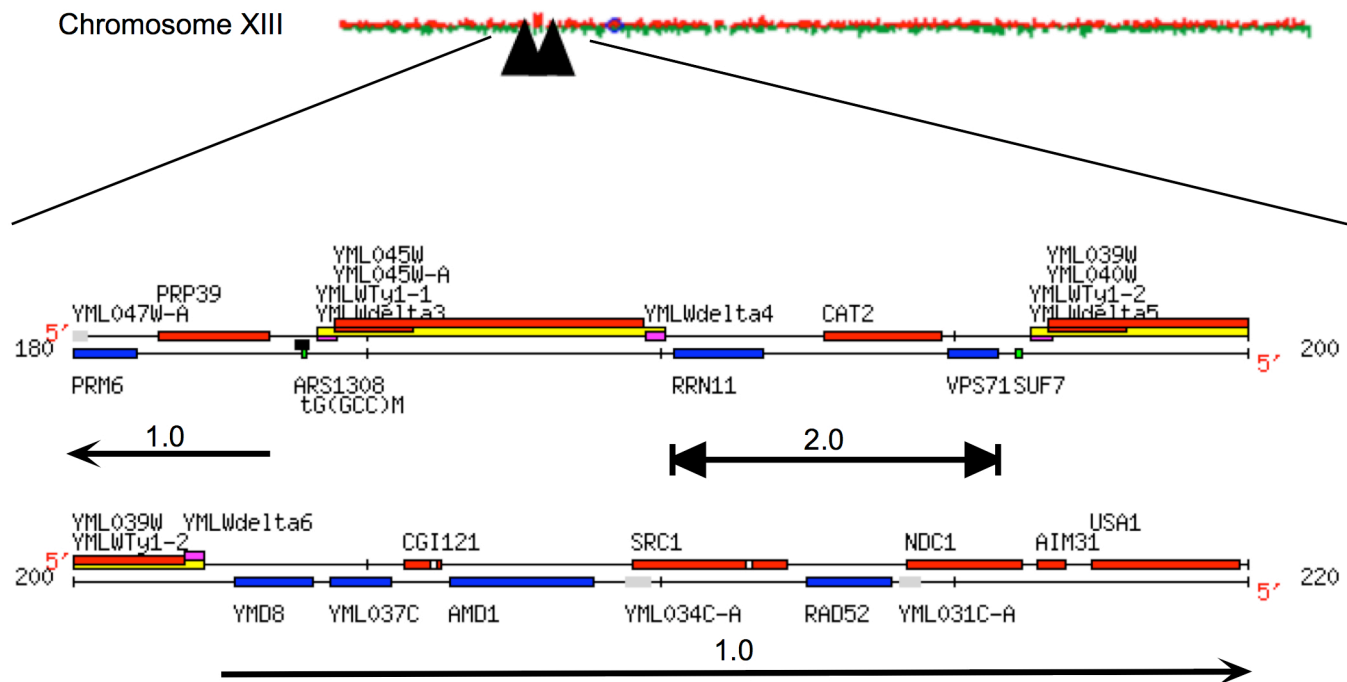

Supplement: pbio.1000161.s003.pdf [file pbio.1000161.s003.pdf]
