# Supplementary material for: Aneuploidy and Improved Growth Are Coincident but Not Causal in a Yeast Cancer Model
Source: PubMed Central journal article supplement (PMC2708349; doi:10.1371/journal.pbio.1000161), 2009-07-28

I  
II  
III  
IV  
V  
VI  
VII  
VIII  
IX  
X  
XI  
XII  
XIII  
XIV  
XV  
XVI

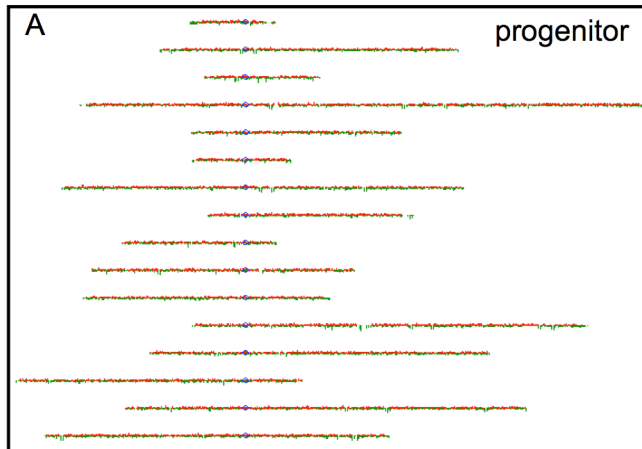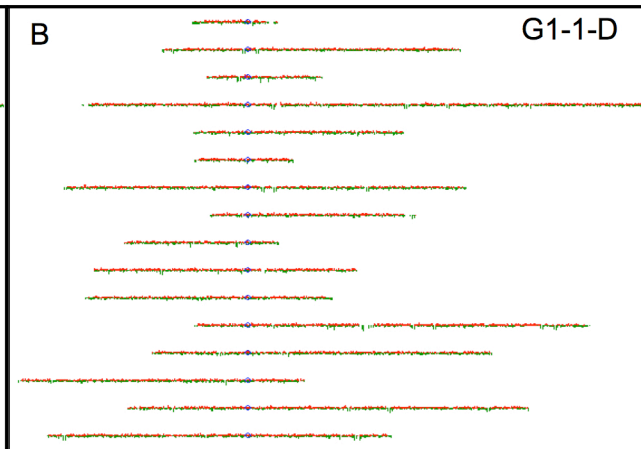

I  
II  
III  
IV  
V  
VI  
VII  
VIII  
IX  
X  
XI  
XII  
XIII  
XIV  
XV  
XVI

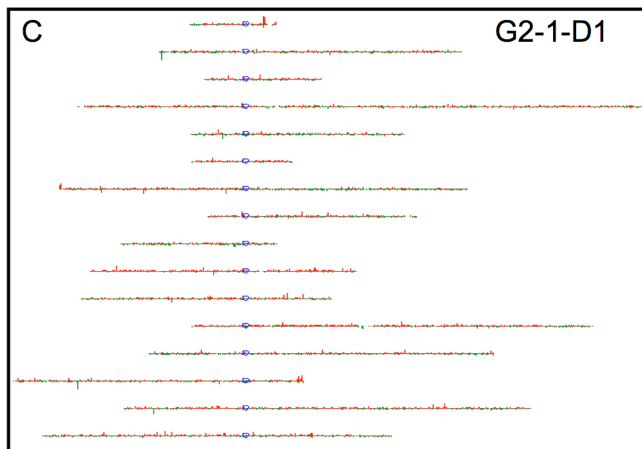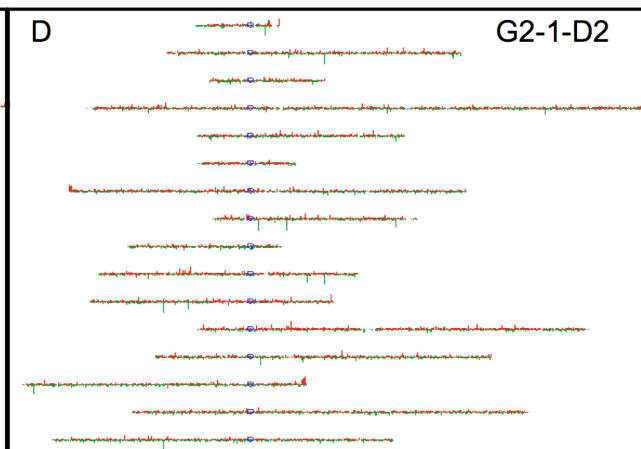

I  
II  
III  
IV  
V  
VI  
VII  
VIII  
IX  
X  
XI  
XII  
XIII  
XIV  
XV  
XVI

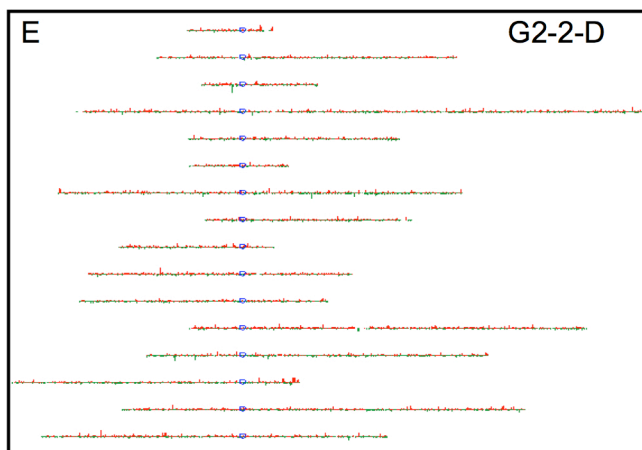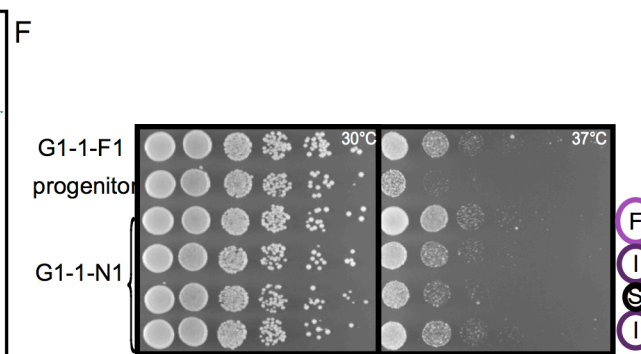

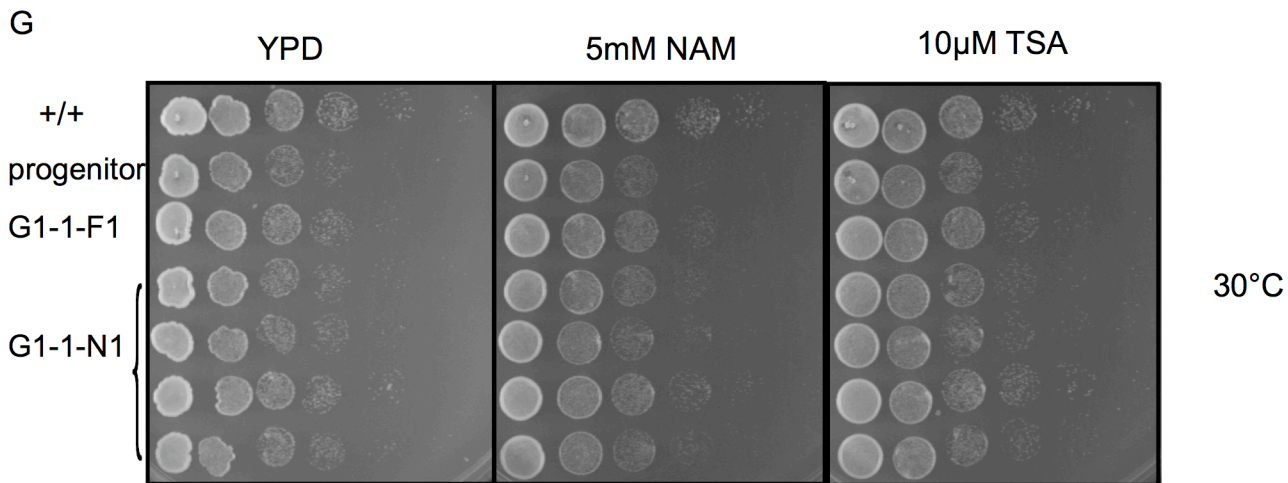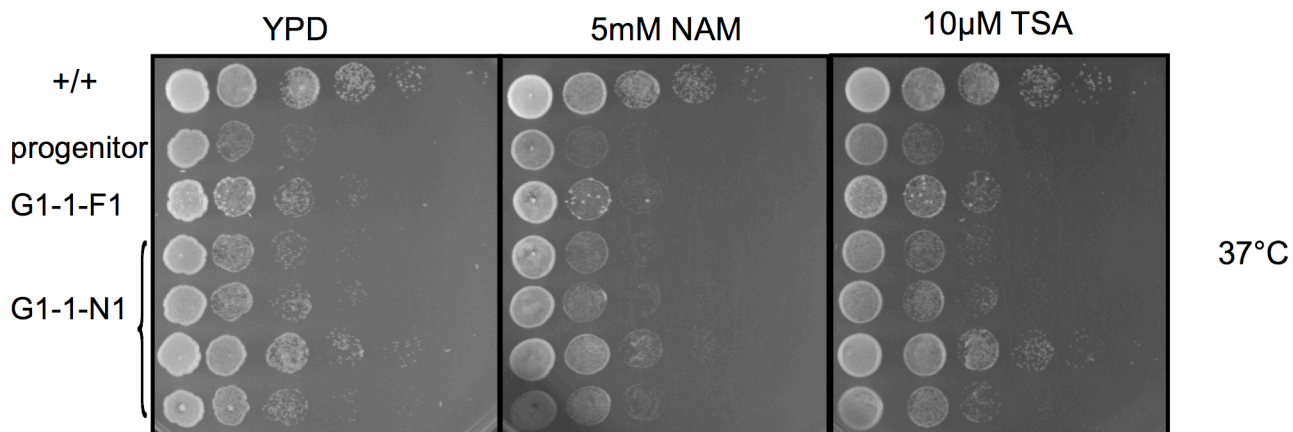

Supplement: pbio.1000161.s004.pdf [file pbio.1000161.s004.pdf]
